# Supplementary material for: A fixel‐based analysis of micro‐ and macro‐structural changes to white matter following adult traumatic brain injury
Source: PubMed Central journal article supplement — Hum Brain Mapp. 2020 Jan 30;41(8):2187–97. doi: 10.1002/hbm.24939 (PMC7268050; doi:10.1002/hbm.24939), 2020-01-30
Supplement: HBM-41-2187-s001.pdf [file HBM-41-2187-s001.pdf]

**A fixel-based analysis of micro- and macro-structural changes to white  
matter following adult traumatic brain injury**

Erica J. Wallace<sup>1</sup>, Jane L. Mathias<sup>1</sup>, Lynn Ward<sup>1</sup>, Jurgen Fripp<sup>2</sup>, Stephen Rose<sup>2</sup> &  
Kerstin Pannek<sup>2</sup>

*<sup>1</sup>Faculty of Health & Medical Sciences, University of Adelaide, Adelaide South Australia, Australia*

*<sup>2</sup>Australian E-Health Research Centre, CSIRO, Brisbane, Australia*

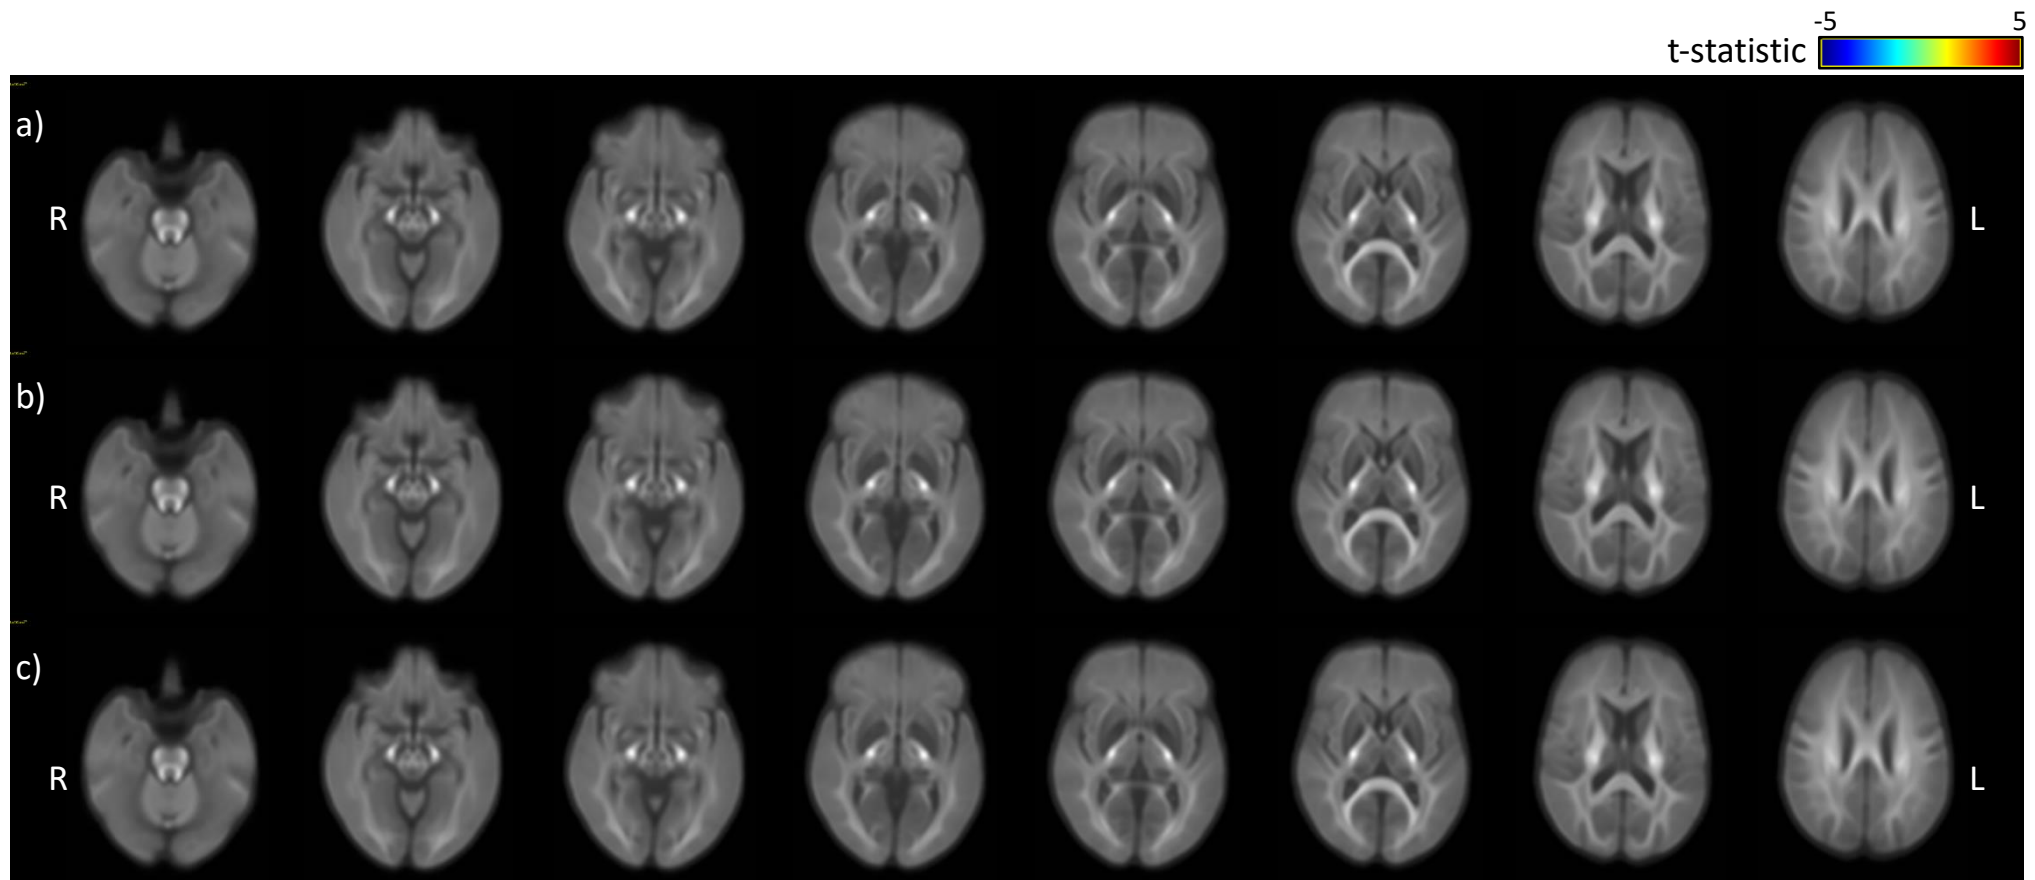

Supplementary Figure S1. Fixels showing significant differences in the fibre density (FD), fibre-bundle cross-section (FC) and fibre density and bundle cross-section (FDC) of the healthy and orthopaedic and control groups, controlling for age and sex (all analyses), and brain volume (FC and FDC) and colour coded by effect size (t-statistic, thresholded at  $p < .05$ ):

- (a) FD;
- (b) FC;
- (c) FDC

No statistically significant group differences were observed.

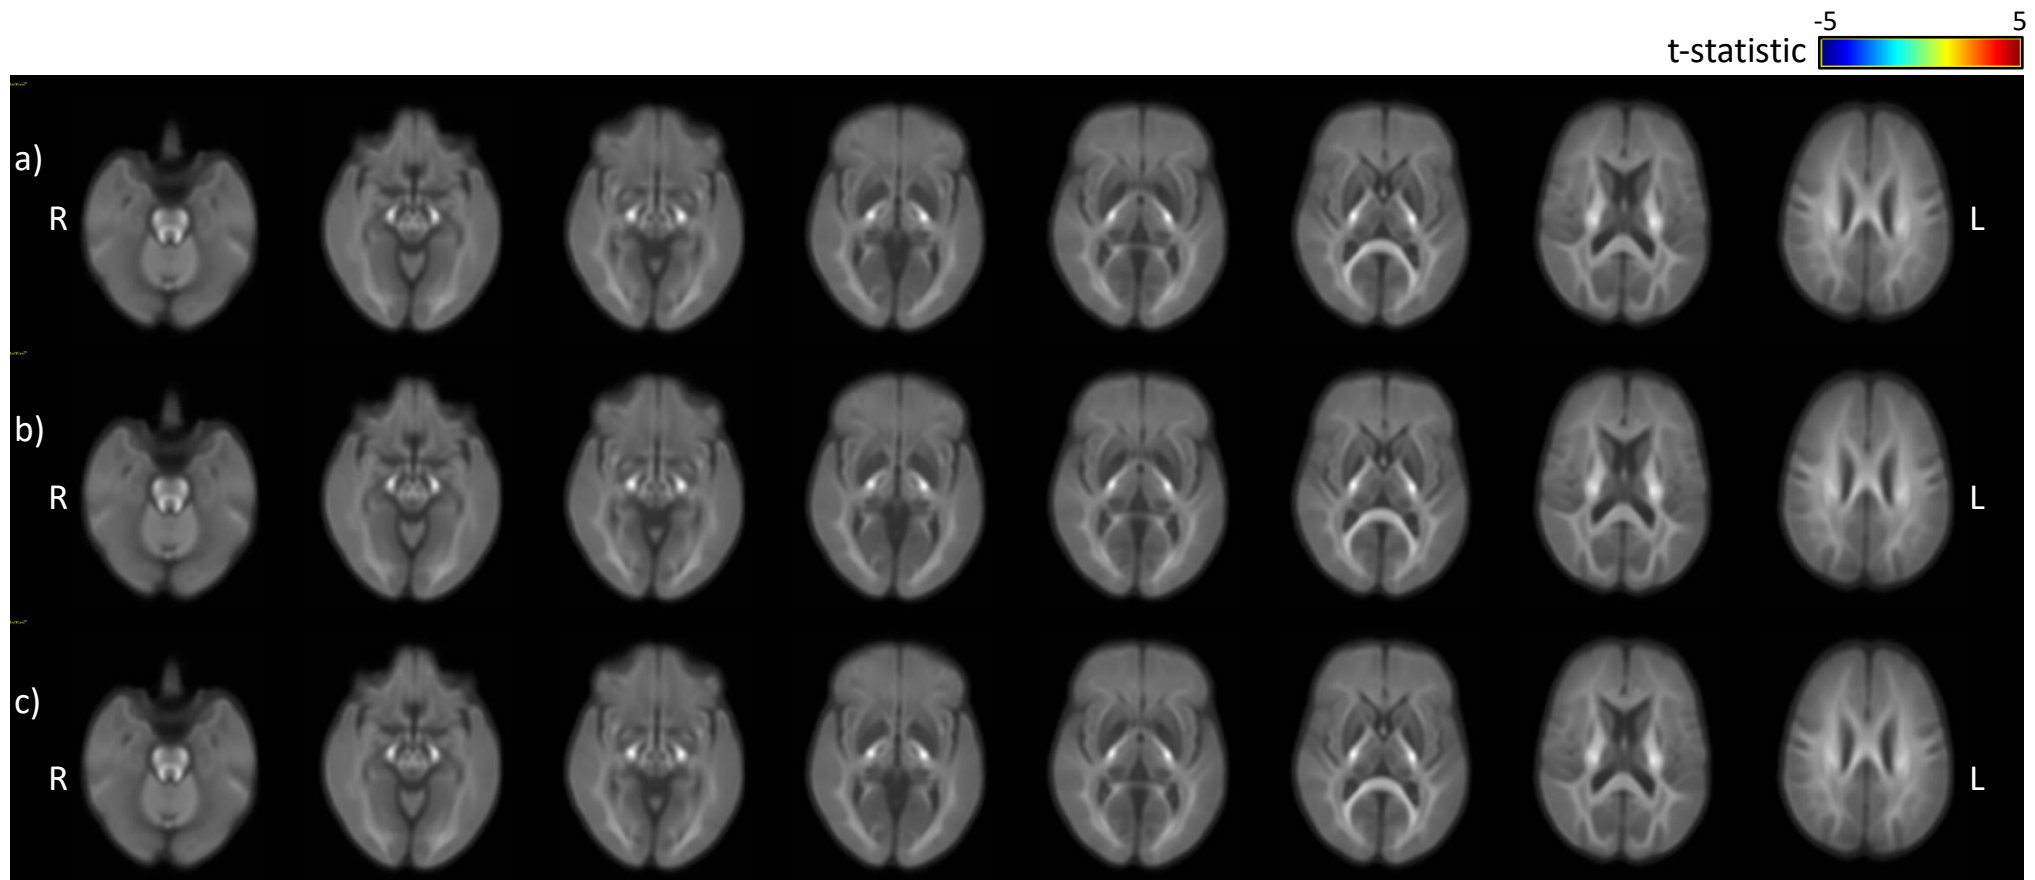

Supplementary Figure S2. Fixels showing significant differences in the fibre density (FD), fibre-bundle cross-section (FC) and fibre density and bundle cross-section (FDC) of the mild TBI and control groups, controlling for age and sex (all analyses), and brain volume (FC and FDC) and colour coded by effect size (t-statistic, thresholded at  $p < .05$ ):

- (a) FD;
- (b) FC;
- (c) FDC

No statistically significant group differences were observed.

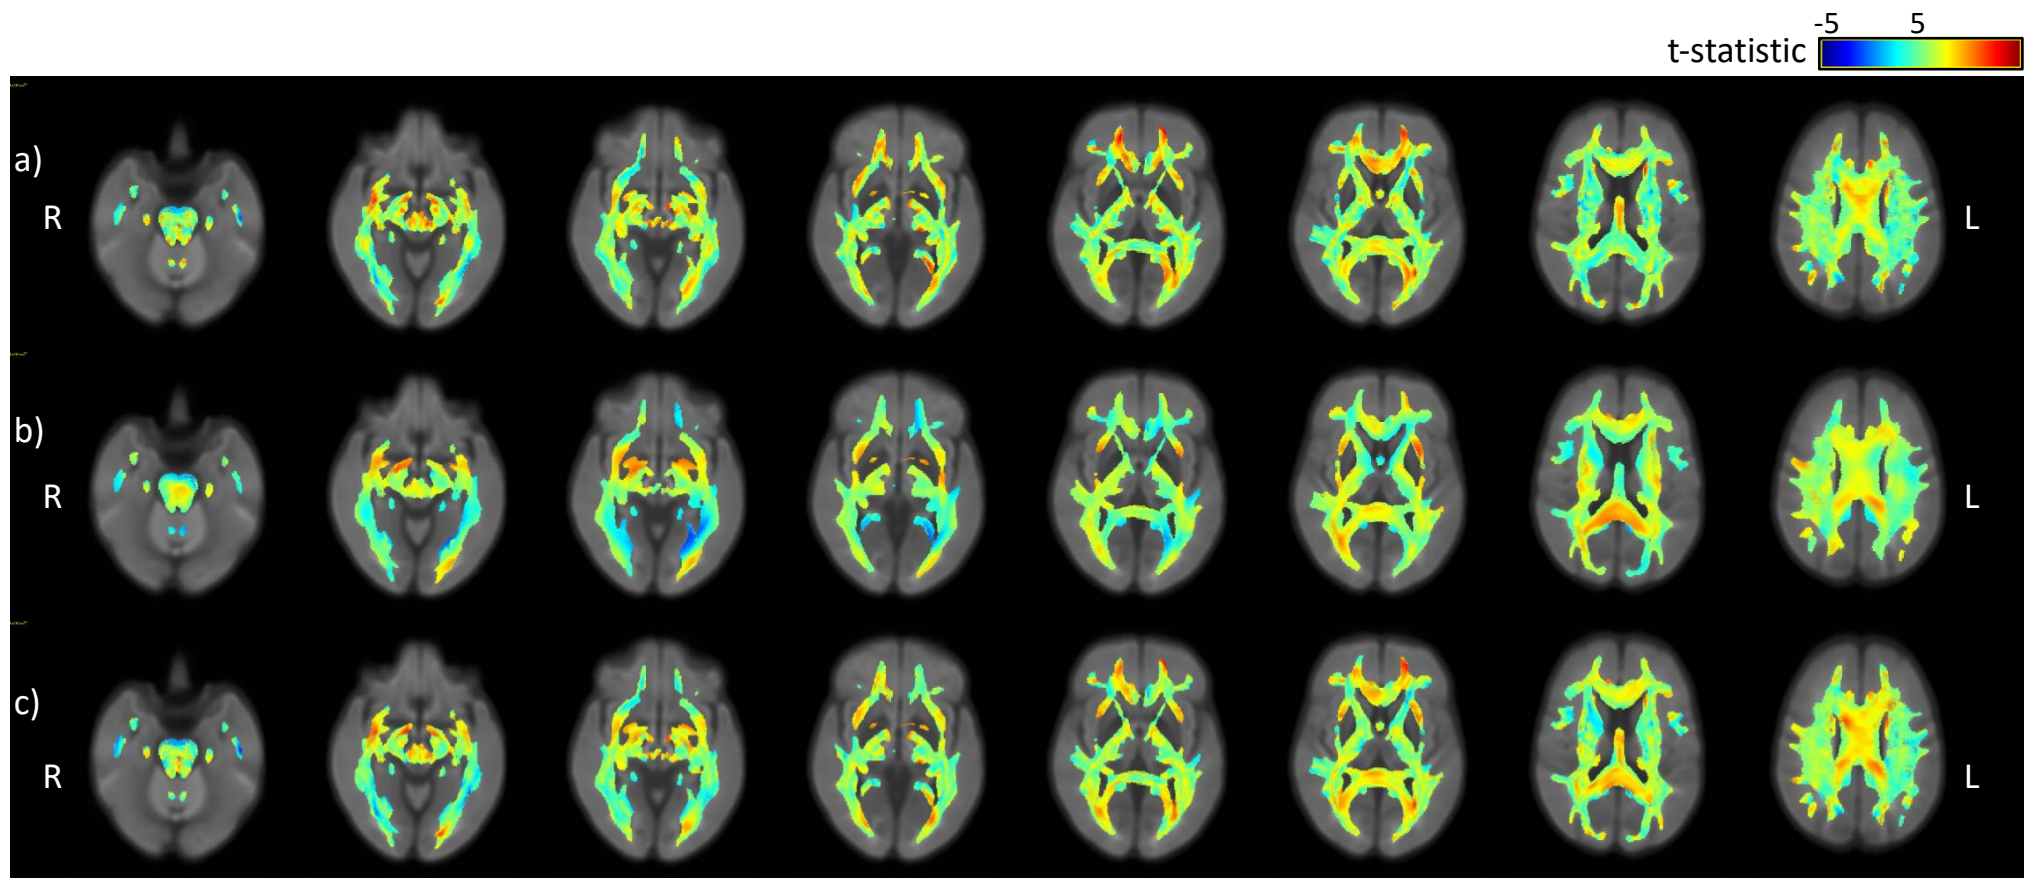

Supplementary Figure S3. Fixels showing un-thresholded differences in the fibre density (FD), fibre-bundle cross-section (FC) and fibre density and bundle cross-section (FDC) of the mild TBI and control groups, controlling for age and sex (all analyses), and brain volume (FC and FDC) and colour coded by effect size (t-statistic) thresholded at  $p < .05$ :

- (a) FD;
- (b) FC;
- (c) FDC

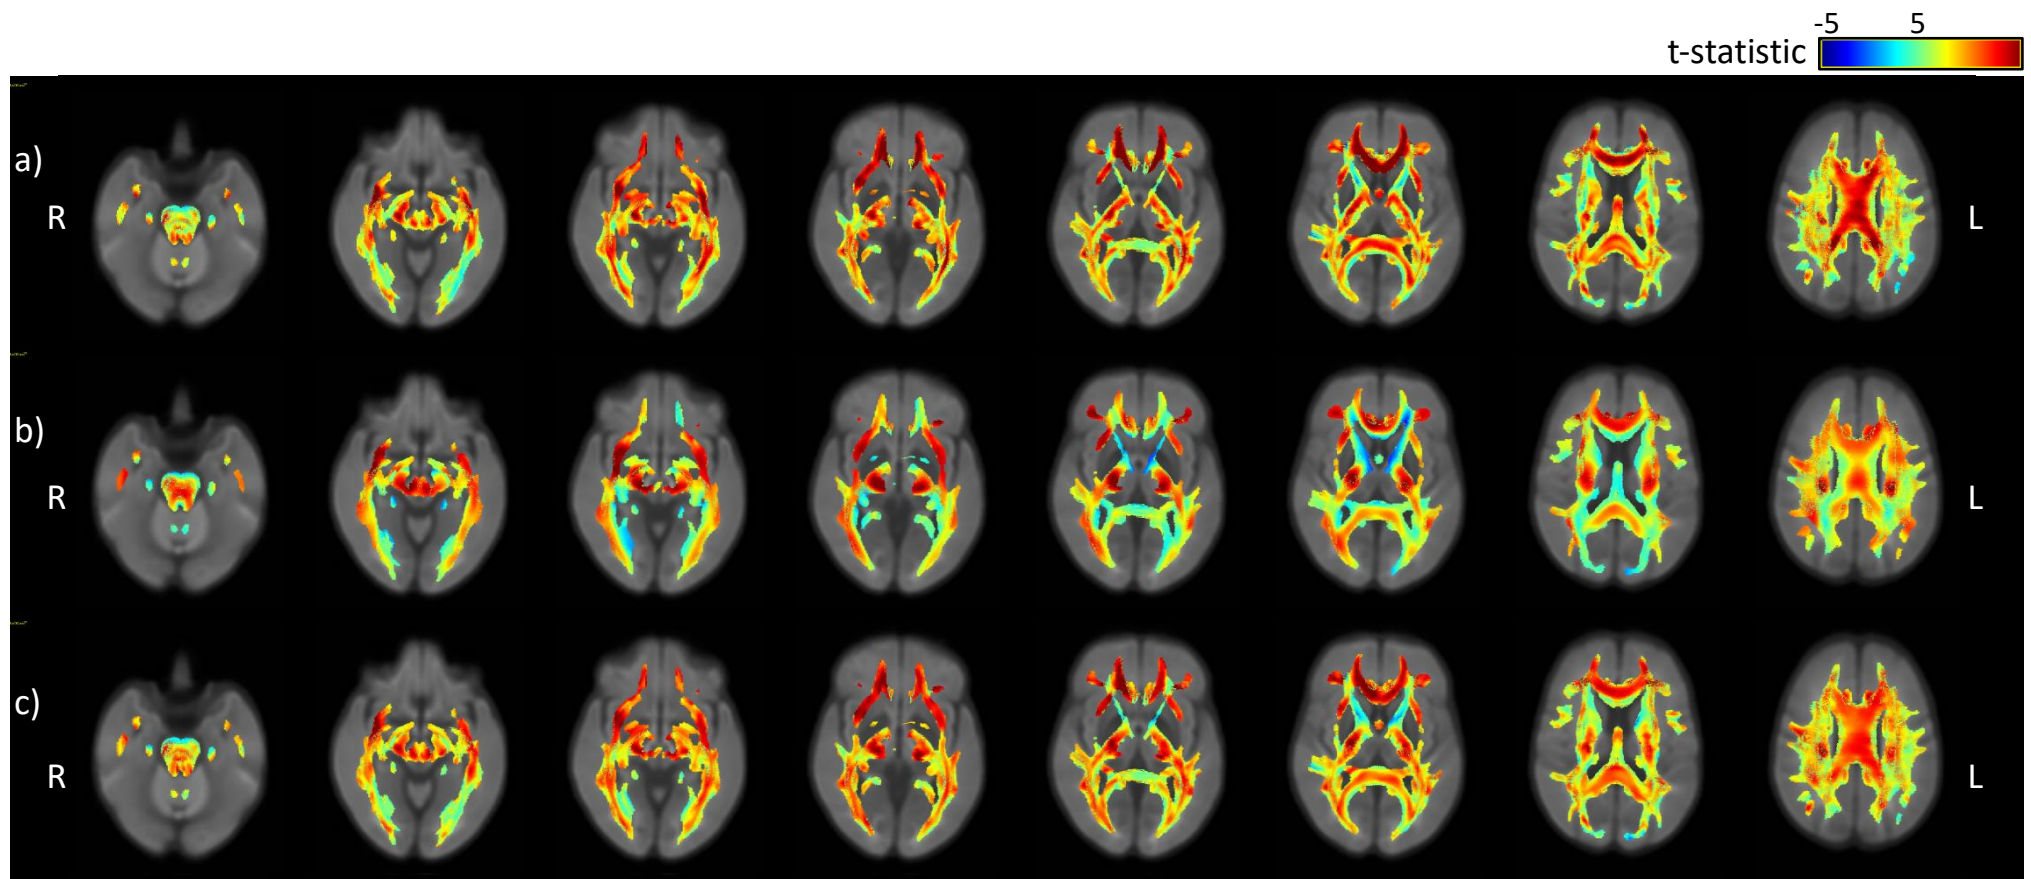

Supplementary Figure S4. Fixels showing un-thresholded differences in the fibre density (FD), fibre-bundle cross-section (FC) and fibre density and bundle cross-section (FDC) of the moderate-severe TBI and control groups, controlling for age and sex (all analyses), and brain volume (FC and FDC) and colour coded by effect size (t-statistic) thresholded at  $p < .05$ :

- (a) FD;
- (b) FC;
- (c) FDC
